# Supplementary material for: Guidance on Short‐Term Management of Atrial Fibrillation in Coronavirus Disease 2019
Source: PubMed Central journal article supplement — J Am Heart Assoc. 2020 Jul 7;9(14):e017529. doi: 10.1161/JAHA.120.017529 (PMC7660727; doi:10.1161/jaha.120.017529), 2020-07-07
Supplement: JAH3-9-e017529-s001.pdf [file JAH3-9-e017529-s001.pdf]

# **SUPPLEMENTAL MATERIAL**

**Table S1. Doses and common side effects of antiarrhythmic drugs and anticoagulants used in atrial fibrillation.**

| Antiarrhythmic/<br>Anticoagulant |                              | Doses for Atrial Fibrillation                                                                                                                                                                                                       | Toxicity                                                                                                       |                                                                     |
|----------------------------------|------------------------------|-------------------------------------------------------------------------------------------------------------------------------------------------------------------------------------------------------------------------------------|----------------------------------------------------------------------------------------------------------------|---------------------------------------------------------------------|
| Class                            | Drug                         |                                                                                                                                                                                                                                     | Non-cardiotoxicity                                                                                             | Cardiotoxicity                                                      |
| IA                               | Procainamide                 | IV Loading: up to 17 mg/kg at 20 to 50 mg/min or 100 mg every 5 min; administer until arrhythmia is controlled<br>Maintenance IV: 1 to 4 mg/min<br>CrCl 10-50: reduce continuous IV 25-50%<br>CrCl <10: reduce continuous IV 50-75% | Positive ANA titer, lupus like syndrome                                                                        | Hypotension                                                         |
|                                  | Disopyramide                 | 100-200 mg q 6 hr; maximum 800 mg/d (immediate release)                                                                                                                                                                             | Anticholinergic                                                                                                | CHF exacerbation, TdP                                               |
|                                  | Quinidine                    | 200-300 mg Q6 -8 hr maximum 600 mg t.i.d.                                                                                                                                                                                           | Thrombocytopenia, cinchonism, pruritus, rash                                                                   | QRS prolongation, TdP                                               |
| IC                               | Flecainide                   | 50-100 mg b.i.d.; maximum 300-400 mg/d                                                                                                                                                                                              | Dizziness, headache, visual blurring,                                                                          | 1:1 atrial flutter, ventricular tachycardia, unmask Brugada pattern |
|                                  | Propafenone                  | 150-300 mg q 8hr (immediate release)                                                                                                                                                                                                | Metallic taste, dizziness                                                                                      |                                                                     |
| II                               | Carvedilol                   | Immediate release: 3.125-25 mg b.i.d., extended release 10-80 mg/day daily                                                                                                                                                          | Dizziness, fatigue, weight gain, diarrhea                                                                      | Bradycardia, heart block, hypotension                               |
|                                  | Metoprolol                   | Oral:25-100 mg b.i.d.(immediate release)<br>50-400 mg daily (extended release)<br>IV:2.5-5 mg over 2 min;repeat dose every 5 min as needed; maximum 15 mg                                                                           | Dizziness, fatigue, depression                                                                                 | Bradycardia, heart block, hypotension                               |
|                                  | Esmolol                      | IV loading dose: 500 mcg/kg over 1 min, follow by 50-300 mcg/kg/min                                                                                                                                                                 | Dizziness, nausea                                                                                              | Bradycardia, heart block, hypotension                               |
| III                              | Amiodarone                   | IV: 300 mg over 1h, then 10-50 mg/h over 24 h<br>Oral maintenance: 100-200 mg daily                                                                                                                                                 | Pulmonary, hepatitis, thyroid toxicity, photosensitivity, skin discoloration, nausea, ataxia, tremor, alopecia | Bradycardia                                                         |
|                                  | Dronedarone                  | 400 mg b.i.d.                                                                                                                                                                                                                       | Anorexia, nausea, hepatotoxicity                                                                               | Bradycardia                                                         |
|                                  | Dofetilide                   | CrCl>60:500 µg b.i.d.,<br>CrCl 40-60: 250 µg b.i.d.,<br>CrCl 20-39: 125 µg b.i.d.                                                                                                                                                   | Nausea, headache                                                                                               | TdP                                                                 |
|                                  | Ibutilide                    | IV 0.01 mg/kg (<60 kg) or 1 mg (≥60 kg) over 10 min                                                                                                                                                                                 | Nausea, headache                                                                                               | TdP                                                                 |
|                                  | Sotalol                      | Oral:80-120 b.i.d.; maximum 240 mg b.i.d. (daily dose if CrCl 30-60)<br>IV: 75 mg b.i.d.; maximum 150 mg b.i.d. (daily dose if CrCl 40-60)                                                                                          | Fatigue, dizziness, dyspnea, weakness                                                                          | Bradycardia, TdP                                                    |
| IV                               | Diltiazem                    | Oral:120-360 mg/d (3-4 divided doses in immediate release/ daily in extended release)<br>IV 0.25 mg/kg bolus over 2 min , then 5-15 mg/h                                                                                            | Peripheral edema, dizziness,                                                                                   | Bradycardia, heart block, hypotension, vasodilation                 |
|                                  | Verapamil                    | Oral: 40-480 mg/d (b.i.d. in immediate release/daily in extended release)<br>IV: 0.075–0.15 mg/kg bolus over 2 min; then 0.005 mg/kg/min                                                                                            | Headache, gingival hyperplasia, fatigue, dizziness                                                             | Bradycardia, heart block, hypotension                               |
| Na/K ATPase inhibitor            | Digoxin                      | IV loading 0.25-0.5 mg, repeat doses of 0.25 mg q 6 hr; maximum 1.5 mg per day, followed by oral maintenance dose of 0.125 to 0.25 mg daily                                                                                         | Nausea, visual disturbance                                                                                     | Bradycardia, heart block, ventricular arrhythmias                   |
| Factor Xa inhibitor              | Apixaban                     | 5 mg b.i.d.<br>2.5 mg b.i.d. if at least 2 of (age ≥80 years, BW 60 kg, or Cr ≥1.5 mg/dL)<br>2.5 mg b.i.d. when co-administered with Ritonavir                                                                                      | Nausea                                                                                                         | Hemorrhagic shock                                                   |
|                                  | Rivaroxaban                  | CrCl >50 mL/min: 20 mg daily<br>CrCl 15 - 50 mL/min: 15 mg daily                                                                                                                                                                    | Insomnia, pruritus                                                                                             | Hemorrhagic shock                                                   |
|                                  | Edoxaban                     | 60 mg daily<br>30 mg daily if met one of the following criteria; CrCL 30-50 mL/min, BW <60 kg, or concomitant use of azithromycin (P-glycoprotein inhibitors)                                                                       | Rash, abnormal liver function tests                                                                            | Hemorrhagic shock                                                   |
| Thrombin inhibitor               | Dabigratan                   | CrCl >30 mL/min: 50 mg daily<br>CrCl 15-30 mL/min: 75 mg daily                                                                                                                                                                      | Dyspepsia                                                                                                      | Hemorrhagic shock                                                   |
| Vitamin K antagonist             | Warfarin                     | Titrate for INR goal 2-3                                                                                                                                                                                                            | Diarrhea, bloating, rash                                                                                       | Hemorrhagic shock, vasculitis                                       |
| Heparin                          | Unfractionated heparin       | Bolus 60 to 80 units/kg (maximum: 5,000 units), followed by IV 12-18 units/kg/h (maximum: 1,000 units/h)                                                                                                                            | Thrombocytopenia                                                                                               | Hemorrhagic shock                                                   |
|                                  | Low molecular weight heparin | 1 mg/kg every 12 hours; adjust dose based on anti-Xa monitoring                                                                                                                                                                     | Edema, nausea                                                                                                  | Hemorrhagic shock                                                   |

ANA: antinuclear antibody; b.i.d.: twice daily; BW: body weight; Cr: creatinine; CHF: congestive heart failure; CrCl: creatinine clearance; INR: the international normalized ratio; IV: intravenous; Na/K: sodium/potassium; t.i.d.: three times daily; TdP: torsades de pointes.
